# Supplementary material for: High-efficiency leaching of valuable metals from waste lithium-ion ternary batteries under mild conditions using green deep eutectic solvents
Source: Royal Society of Chemistry journal article supplement (doi:10.1039/d4gc04373a), 2024-11-08
Supplement: d4gc04373a1.pdf [file d4gc04373a1.pdf]

## Supplemental Information

### Supplemental Table and Figure

Table S1. Components and content of spent lithium batteries.

| Element | Li   | Co    | Ni    | Mn    | Al    | Cu    |
|---------|------|-------|-------|-------|-------|-------|
| Content | 6.5% | 20.4% | 20.9% | 18.2% | 0.46% | 0.05% |

The cathode powder was procured from the cathode powder that had been subjected to pre-treatment by the merchant in large quantities of the LNCM111-type used lithium-ion battery (the used LNCM111 was discharged in a sodium chloride solution with a mass fraction of A 10% fraction was then obtained, and the discharged battery was subsequently dried and disassembled to obtain the positive and negative electrodes. These were roasted for two hours at 450°C, during which the electrolyte and binder were decomposed. Further leaching with water yielded a pure positive electrode powder that could be used in this experiment.

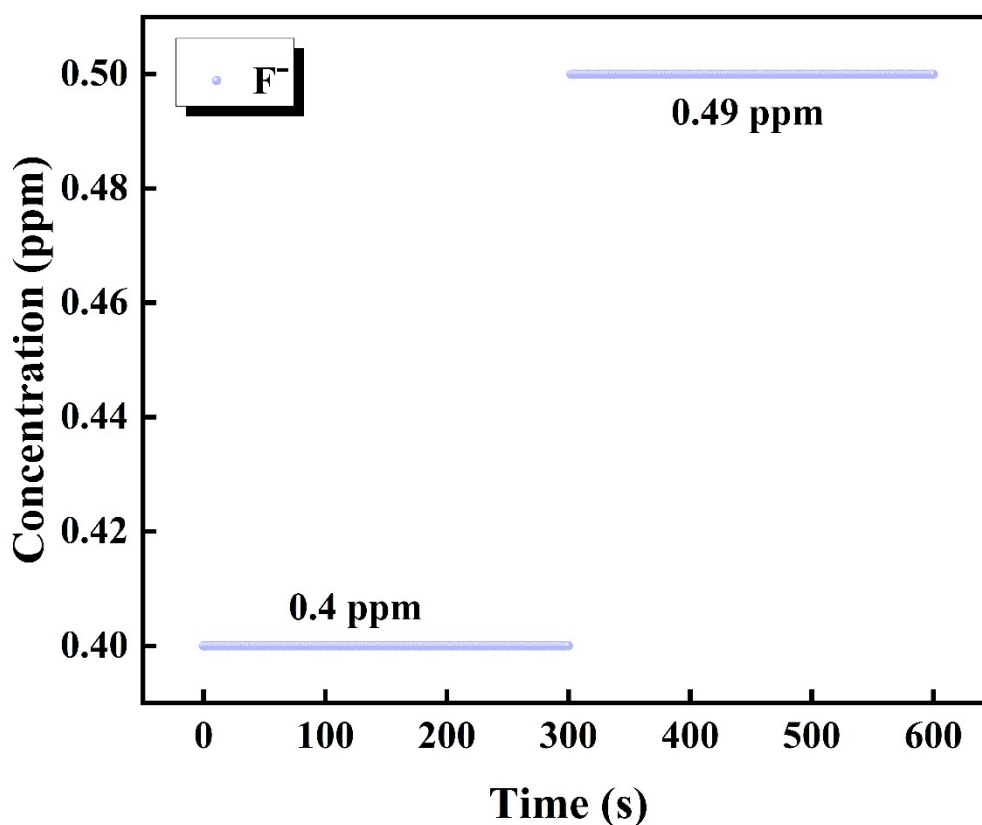

**Figure.S1.** LNCM111 Elemental Fluorine in Anode Powder Test Chart

**Table S2. Uniform Design Experimentation of factor levels.**

| <b>Factor</b>                 | <b>1</b>  | <b>2</b>  | <b>3</b>  | <b>4</b>  |
|-------------------------------|-----------|-----------|-----------|-----------|
| <b>Temperature<br/>(°C)</b>   | <b>40</b> | <b>50</b> | <b>60</b> | <b>70</b> |
| <b>Time (min)</b>             | <b>3</b>  | <b>6</b>  | <b>9</b>  | <b>12</b> |
| <b>S/L (g L<sup>-1</sup>)</b> | <b>20</b> | <b>25</b> | <b>30</b> | <b>35</b> |

The elemental fluorine content was determined using an ion chromatography (IC) instrument. The US Thermo Fisher Scientific ICS-5000+ was employed, utilising an Aptar 855 potentiometric titration robot, an ISE-fluoride ion-selective electrode, an LL ISE reference electrode, and a sample dilution-adjustment pH measurement method.

**Table S3. The regression equations derived from the Mixing Design and Uniform experimental design are related to the correlation coefficient  $R^2$  and p-value statistics.**

| Model | Mixing Design |                | Uniform Experimental Design |                |
|-------|---------------|----------------|-----------------------------|----------------|
|       | p-value       | R <sup>2</sup> | p-value                     | R <sup>2</sup> |
| Ni    | <0.002        | 0.96           | <0.001                      | 0.99           |
| Co    | <0.002        | 0.96           | <0.001                      | 0.99           |
| Mn    | <0.002        | 0.96           | <0.001                      | 0.99           |
| Li    | <0.002        | 0.96           | <0.001                      | 0.99           |

**Table S4. Statistical data on fitted values and errors of Nickel leaching rates in Mixing Experiments.**

| No | Observed values | Fitted value | Error (%) |
|----|-----------------|--------------|-----------|
| 1  | 0.7660          | 0.7523       | 0.0137    |
| 2  | 0.7508          | 0.7528       | -0.0020   |
| 3  | 0.7777          | 0.7670       | 0.0107    |
| 4  | 0.8914          | 0.8708       | 0.0206    |
| 5  | 0.7570          | 0.7610       | -0.0040   |
| 6  | 0.7827          | 0.7888       | -0.0061   |
| 7  | 0.7895          | 0.8026       | -0.0131   |
| 8  | 0.7695          | 0.7520       | 0.0175    |

|    |        |        |         |
|----|--------|--------|---------|
| 9  | 0.7878 | 0.8002 | -0.0124 |
| 10 | 0.7788 | 0.7930 | -0.0142 |
| 11 | 0.7887 | 0.7994 | -0.0107 |

---

**Table S5. Statistical data on fitted values and errors of Manganese leaching rates in Mixing Experiments.**

| No | Observed values | Fitted value | Error (%) |
|----|-----------------|--------------|-----------|
| 1  | 0.7709          | 0.7531       | 0.0178    |
| 2  | 0.7545          | 0.7573       | -0.0028   |
| 3  | 0.7762          | 0.7642       | 0.0120    |
| 4  | 0.8914          | 0.8660       | 0.0254    |
| 5  | 0.7751          | 0.7801       | -0.0050   |
| 6  | 0.7843          | 0.7897       | -0.0054   |
| 7  | 0.7798          | 0.7958       | -0.0160   |

|           |        |        |         |
|-----------|--------|--------|---------|
| <b>8</b>  | 0.7792 | 0.7580 | 0.0212  |
| <b>9</b>  | 0.7803 | 0.7998 | -0.0195 |
| <b>10</b> | 0.7776 | 0.7925 | -0.0149 |
| <b>11</b> | 0.7864 | 0.7991 | -0.0127 |

---

**Table S6. Statistical data on fitted values and errors of Cobalt leaching rates in Mixing Experiments.**

| <b>No</b> | <b>Observed values</b> | <b>Fitted value</b> | <b>Error</b> |
|-----------|------------------------|---------------------|--------------|
| <b>1</b>  | 0.8007                 | 0.7951              | 0.0056       |
| <b>2</b>  | 0.8054                 | 0.8066              | -0.0012      |
| <b>3</b>  | 0.8299                 | 0.8225              | 0.0074       |
| <b>4</b>  | 0.8910                 | 0.8781              | 0.0129       |
| <b>5</b>  | 0.7815                 | 0.7847              | -0.0032      |
| <b>6</b>  | 0.8296                 | 0.8337              | -0.0041      |
| <b>7</b>  | 0.8183                 | 0.8258              | -0.0075      |

**Table S7. Statistical data on fitted values and errors of Lithium leaching rates in Mixing Experiments.**

| <b>No</b> | <b>Observed values</b> | <b>Fitted value</b> | <b>Error</b> |
|-----------|------------------------|---------------------|--------------|
| <b>1</b>  | 0.8232                 | 0.8456              | -0.0224      |
| <b>2</b>  | 0.8694                 | 0.8671              | 0.0023       |
| <b>3</b>  | 0.8720                 | 0.8829              | -0.0109      |
| <b>4</b>  | 0.7535                 | 0.7769              | -0.0234      |
| <b>5</b>  | 0.7861                 | 0.7830              | 0.0031       |
| <b>6</b>  | 0.8537                 | 0.8470              | 0.0067       |
| <b>7</b>  | 0.8481                 | 0.8314              | 0.0167       |
| <b>8</b>  | 0.8146                 | 0.8263              | -0.0117      |
| <b>9</b>  | 0.8456                 | 0.8174              | 0.0282       |
| <b>10</b> | 0.8338                 | 0.8232              | 0.0106       |
| <b>11</b> | 0.8189                 | 0.8180              | 0.0009       |
| <b>8</b>  | 0.8072                 | 0.7927              | 0.0145       |
| <b>9</b>  | 0.8303                 | 0.8328              | -0.0025      |
| <b>10</b> | 0.8172                 | 0.8287              | -0.0115      |
| <b>11</b> | 0.8220                 | 0.8324              | -0.0104      |

**Table S8. Data statistics for Uniform Experimental Design Nickel fitted values and relative errors.**

| <b>Samples</b> | <b>Observed values</b> | <b>Fitted value</b> | <b>Error</b> | <b>Relative error (%)</b> |
|----------------|------------------------|---------------------|--------------|---------------------------|
| 1              | 0.9873                 | 0.9642              | 0.0231       | 2.3360                    |
| 2              | 0.7809                 | 0.7578              | 0.0231       | 2.9535                    |
| 3              | 0.9618                 | 0.9821              | -0.0203      | 2.1149                    |
| 4              | 0.7764                 | 0.8423              | -0.0659      | 8.4874                    |
| 5              | 0.7343                 | 0.7224              | 0.0119       | 1.6192                    |
| 6              | 0.9922                 | 0.9691              | 0.0231       | 2.3245                    |
| 7              | 0.7677                 | 0.7880              | -0.0203      | 2.6496                    |
| 8              | 0.9888                 | 0.9941              | -0.0053      | 0.5361                    |
| 9              | 0.9497                 | 0.9327              | 0.0170       | 1.7949                    |
| 10             | 0.7412                 | 0.7615              | -0.0203      | 2.7444                    |
| 11             | 0.7645                 | 0.7475              | 0.0170       | 2.2298                    |
| 12             | 0.7781                 | 0.7611              | 0.0170       | 2.1908                    |

**Table S9. Data statistics for Uniform Experimental Design Cobalt fitted values and relative errors.**

| <b>Samples</b> | <b>Observed values</b> | <b>Fitted value</b> | <b>Error</b> | <b>Relative error (%)</b> |
|----------------|------------------------|---------------------|--------------|---------------------------|
| <b>1</b>       | 0.9896                 | 0.9664              | 0.0232       | 2.3462                    |
| <b>2</b>       | 0.7844                 | 0.7612              | 0.0232       | 2.9599                    |
| <b>3</b>       | 0.9655                 | 0.9844              | -0.0189      | 1.9592                    |
| <b>4</b>       | 0.7791                 | 0.8454              | -0.0663      | 8.5144                    |
| <b>5</b>       | 0.7388                 | 0.7263              | 0.0125       | 1.6905                    |
| <b>6</b>       | 0.9943                 | 0.9711              | 0.0232       | 2.3351                    |
| <b>7</b>       | 0.7706                 | 0.7895              | -0.0189      | 2.4548                    |
| <b>8</b>       | 0.9921                 | 0.9980              | -0.0059      | 0.5903                    |
| <b>9</b>       | 0.9449                 | 0.9293              | 0.0156       | 1.6509                    |
| <b>10</b>      | 0.7361                 | 0.7550              | -0.0189      | 2.5698                    |
| <b>11</b>      | 0.7607                 | 0.7451              | 0.0156       | 2.0507                    |
| <b>12</b>      | 0.7796                 | 0.7640              | 0.0156       | 2.0010                    |



**Table S10. Data statistics for Uniform Experimental Design Manganese fitted values and relative errors.**

| <b>Samples</b> | <b>Observed values</b> | <b>Fitted value</b> | <b>Error</b> | <b>Relative error (%)</b> |
|----------------|------------------------|---------------------|--------------|---------------------------|
| 1              | 0.9995                 | 0.9811              | 0.0184       | 1.8374                    |
| 2              | 0.8177                 | 0.7993              | 0.0184       | 2.2459                    |
| 3              | 0.9991                 | 1.0199              | -0.0208      | 2.0831                    |
| 4              | 0.8188                 | 0.8713              | -0.0525      | 6.4082                    |
| 5              | 0.7758                 | 0.7679              | 0.0079       | 1.0221                    |
| 6              | 0.9999                 | 0.9815              | 0.0184       | 1.8366                    |
| 7              | 0.8084                 | 0.8292              | -0.0208      | 2.5745                    |
| 8              | 0.9998                 | 1.0025              | -0.0027      | 0.2683                    |
| 9              | 0.9987                 | 0.9805              | 0.0182       | 1.8213                    |
| 10             | 0.7924                 | 0.8132              | -0.0208      | 2.6265                    |
| 11             | 0.8182                 | 0.8000              | 0.0182       | 2.2230                    |
| 12             | 0.8218                 | 0.8036              | 0.0182       | 2.2133                    |

**Table S11. Data statistics for Uniform Experimental Design Lithium fitted values and relative errors.**

| <b>Samples</b> | <b>Observed values</b> | <b>Fitted value</b> | <b>Error</b> | <b>Relative error (%)</b> |
|----------------|------------------------|---------------------|--------------|---------------------------|
| <b>1</b>       | 0.9995                 | 0.9811              | 0.0184       | 1.8374                    |
| <b>2</b>       | 0.8177                 | 0.7993              | 0.0184       | 2.2459                    |
| <b>3</b>       | 0.9991                 | 1.0199              | -0.0208      | 2.0831                    |
| <b>4</b>       | 0.8188                 | 0.8713              | -0.0525      | 6.4082                    |
| <b>5</b>       | 0.7758                 | 0.7679              | 0.0079       | 1.0221                    |
| <b>6</b>       | 0.9999                 | 0.9815              | 0.0184       | 1.8366                    |
| <b>7</b>       | 0.8084                 | 0.8292              | -0.0208      | 2.5745                    |
| <b>8</b>       | 0.9998                 | 1.0025              | -0.0027      | 0.2683                    |
| <b>9</b>       | 0.9987                 | 0.9805              | 0.0182       | 1.8213                    |
| <b>10</b>      | 0.7924                 | 0.8132              | -0.0208      | 2.6265                    |
| <b>11</b>      | 0.8182                 | 0.8000              | 0.0182       | 2.2230                    |
| <b>12</b>      | 0.8218                 | 0.8036              | 0.0182       | 2.2133                    |

**Table S13. Statistical and quantitative comparison of cost, dosage, and toxicity of DES**

| <b>and its components.</b>    |                     |                |                  |                         |            |
|-------------------------------|---------------------|----------------|------------------|-------------------------|------------|
| <b>Samp</b>                   | No 1. (ppm)         | No 2. (ppm)    | No 3. (ppm)      | Average values ( ppm )  |            |
| <b>A<sub>DES</sub></b>        | 0.066               | 0.069          | 0.066            | <b>Toxicity and</b>     |            |
| <b>C<sub>components</sub></b> | 0.011               | 0.010          | 0.009            | <b>characterization</b> |            |
|                               | <b>Unit cost of</b> | <b>Reagent</b> | <b>Synthetic</b> |                         | <b>Ref</b> |
|                               | <b>reagents</b>     | <b>usage</b>   | <b>DES cost</b>  |                         |            |
|                               | <b>(\$/g)</b>       | <b>(g)</b>     | <b>(\$)</b>      |                         |            |

The concentrations of Al and Cu were tested under the optimal leaching conditions, and the average values were 0.067 ppm and 0.010 ppm for each group of tests repeated three times (Table S12). These results indicate that only a minimal amount of Al and Cu remained in the cathode powder during the pretreatment process.

|                               |           |      |          |                                         |                    |
|-------------------------------|-----------|------|----------|-----------------------------------------|--------------------|
| <b>ChCl-EG</b>                | 0.043\$/g | 5g   | 0.21\$   | EG:Low toxicity for animals             | 1                  |
| <b>ChCl-LA</b>                | 0.057\$/g | 7.5g | 0.4275\$ | LA:Non-toxicity                         | 2                  |
| <b>BeCl-EG</b>                | 0.043\$/g | 20g  | 0.37\$   | EG:Low toxicity for animals             | 3                  |
| <b>BeCl-OxA</b>               | 0.26\$/g  | /    | /        | OxA:Highly toxic and strongly corrosive | 4                  |
| <b>BeCl-CA</b>                | 0.091\$/g | 14g  | 1.27\$   | CA:Non-toxicity                         | 5                  |
| <b>EG-SAD</b>                 | 0.043\$/g | 30ml | 1.28\$   | SAD:Toxic and causes water pollution    | 6                  |
| <b>DMT/OxA/H<sub>2</sub>O</b> | 0.28\$/g  | 14g  | 3.85\$   | OxA:Highly toxic and strongly corrosive | 7                  |
| <b>DMSP-VC-H<sub>2</sub>O</b> | 0.083\$/g | 2.5g | 0.16\$   | VC:Non-toxicity                         | <b>(This work)</b> |

## References

1. M. K. Tran, M.-T. F. Rodrigues, K. Kato, G. Babu and P. M. J. N. E. Ajayan, 2019, **4**, 339-345.
2. Y. Tian, W. Chen, B. Zhang, Y. Chen, R. Shi, S. Liu, Z. Zhang and T. J. C. Mu, 2022, **15**, e202200524.
3. Y. Luo, C. Yin, L. Ou and C. J. G. C. Zhang, 2022, **24**, 6562-6570.
4. X. Chang, M. Fan, C. F. Gu, W. H. He, Q. Meng, L. J. Wan and Y. G. J. A. C. I. E. Guo, 2022, **61**, e202202558.
5. Y. Luo, L. Ou and C. J. W. M. Yin, 2023, **164**, 1-8.
6. S. Tang, M. Zhang, M. J. A. S. C. Guo and Engineering, 2022, **10**, 975-985.
7. Y. Luo, C. Yin and L. J. S. o. t. T. E. Ou, 2023, **902**, 166095.
